# Supplementary material for: On the reactivity of complexes [Ni(NHC)2] with CS2
Source: Royal Society of Chemistry journal article supplement (doi:10.1039/d4dt03497j), 2025-01-01
Supplement: d4dt03497j1.pdf [file d4dt03497j1.pdf]

## Electronic Supplementary Information for

# On the reactivity of complexes $[\text{Ni}(\text{NHC})_2]$ with $\text{CS}_2$

Martin S. Luff<sup>[a]</sup>, Celine S. Corsei, Udo Radius<sup>\*[a]</sup>

[a] Institute for Inorganic Chemistry, Julius-Maximilians-Universität Würzburg, Am Hubland, 97074 Würzburg, Germany.

\*Corresponding author Email address: [u.radius@uni-wuerzburg.de](mailto:u.radius@uni-wuerzburg.de)

### Table of Content

|   |                                                            |    |
|---|------------------------------------------------------------|----|
| 1 | NMR Spectra .....                                          | 2  |
| 2 | IR Spectra.....                                            | 8  |
| 3 | High Resolution Mass Spectrometry (HRMS) Data.....         | 11 |
| 4 | Cartesian Coordinates of Geometry Optimized Complexes..... | 13 |

# 1 NMR Spectra

## [Ni(*l*iPr<sup>Me</sup>)<sub>2</sub>( $\eta^2$ -CS<sub>2</sub>)] (1a)

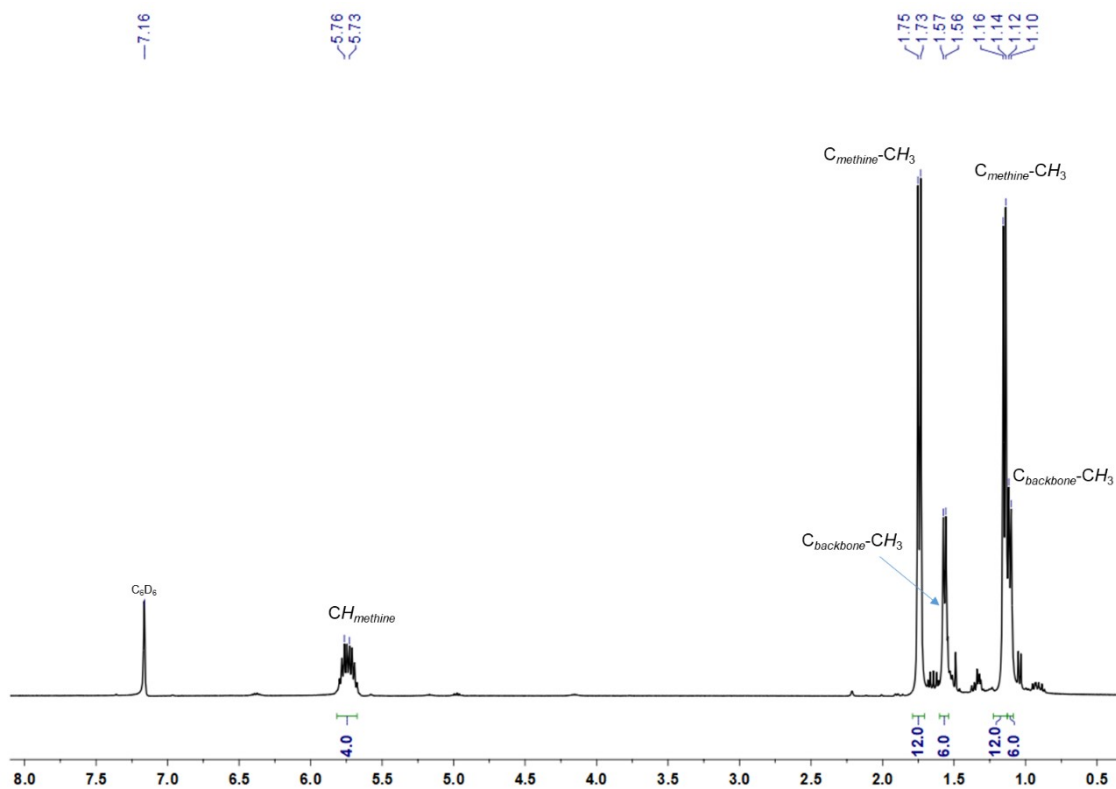

Figure S1. <sup>1</sup>H NMR spectrum of [Ni(*l*iPr<sup>Me</sup>)<sub>2</sub>( $\eta^2$ -CS<sub>2</sub>)] (1a) in C<sub>6</sub>D<sub>6</sub>.

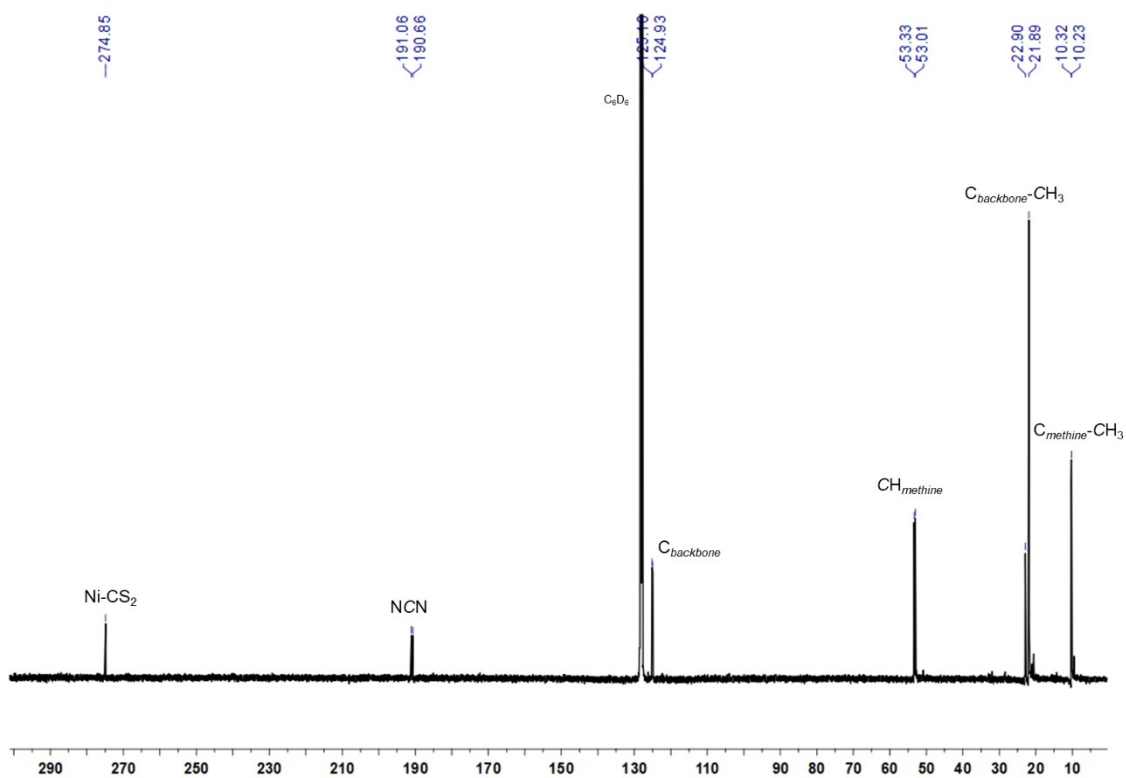

Figure S2. <sup>13</sup>C{<sup>1</sup>H} NMR spectrum of [Ni(*l*iPr<sup>Me</sup>)<sub>2</sub>( $\eta^2$ -CS<sub>2</sub>)] (1a) in C<sub>6</sub>D<sub>6</sub>.

**[Ni(*l*iPr)<sub>2</sub>( $\eta^2$ -CS<sub>2</sub>)] (1b)**

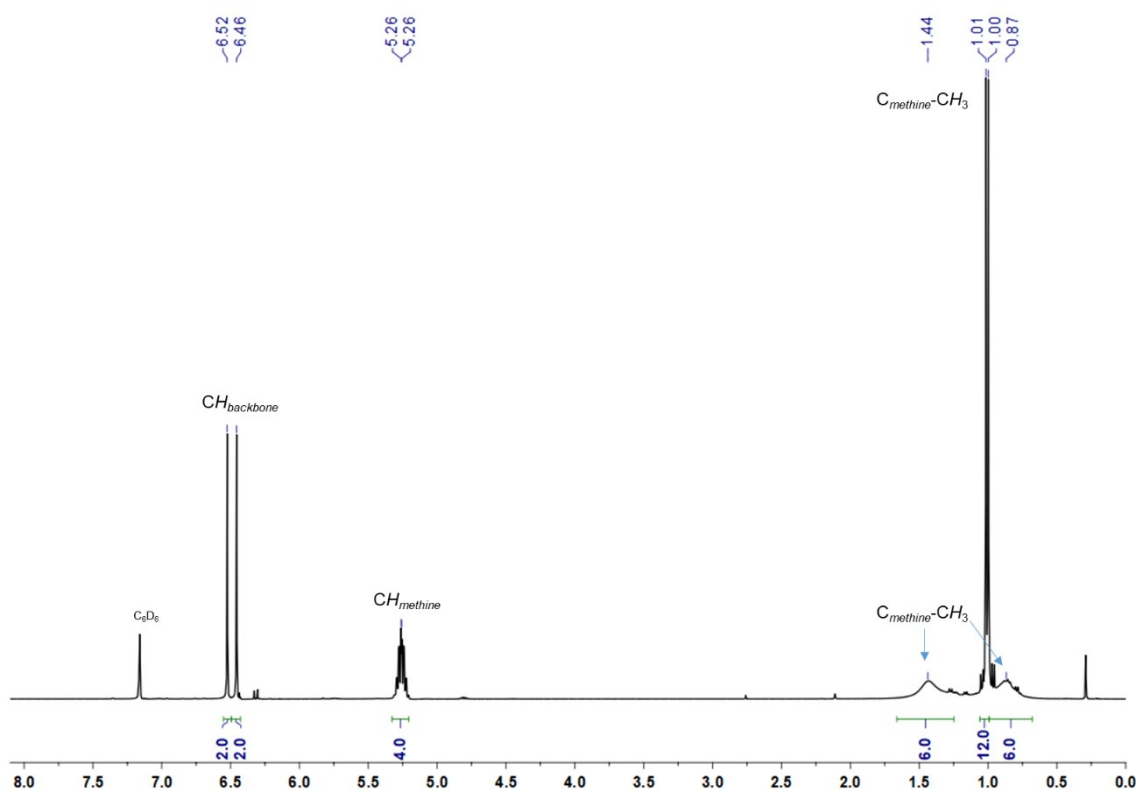

**Figure S3.** <sup>1</sup>H NMR spectrum of [Ni(*l*iPr)<sub>2</sub>( $\eta^2$ -CS<sub>2</sub>)] (1b) in C<sub>6</sub>D<sub>6</sub>.

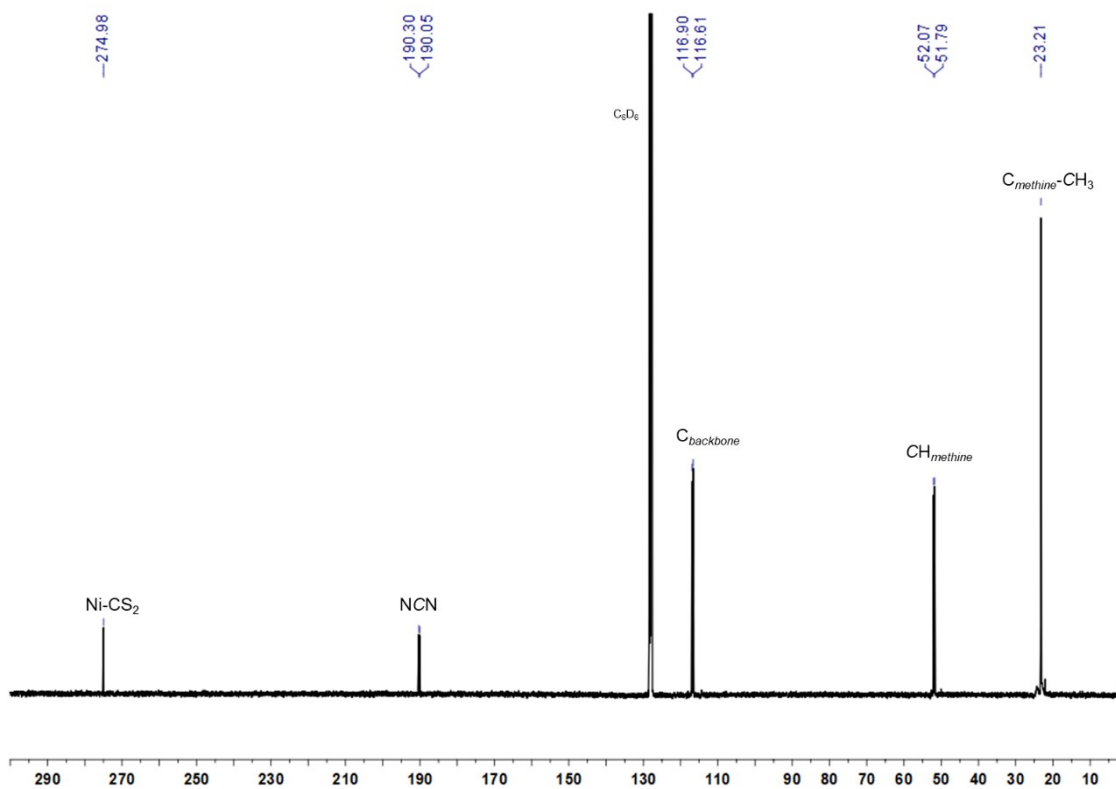

**Figure S4.** <sup>13</sup>C{<sup>1</sup>H} NMR spectrum of [Ni(*l*iPr)<sub>2</sub>( $\eta^2$ -CS<sub>2</sub>)] (1b) in C<sub>6</sub>D<sub>6</sub>.

**[{Ni(IDipp)( $\mu^2$ -CS<sub>2</sub>)<sub>2</sub>}]<sub>2</sub> (2c)**

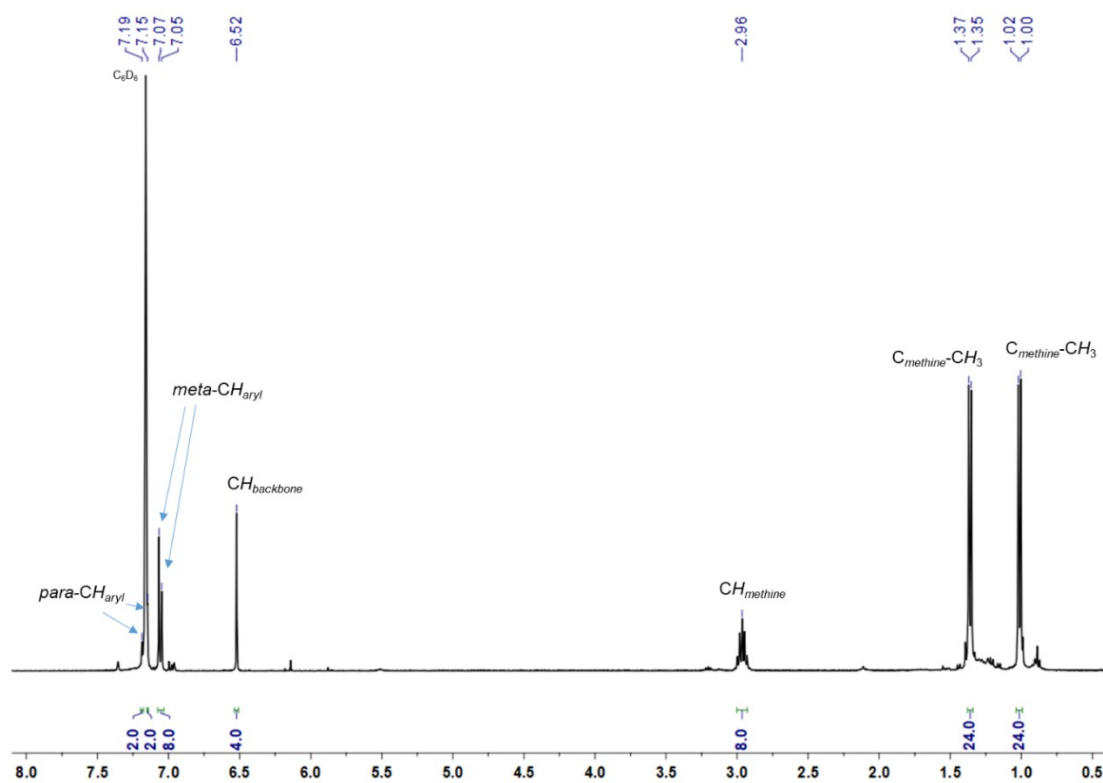

**Figure S5.** <sup>1</sup>H NMR spectrum of **[{Ni(IDipp)( $\mu^2$ -CS<sub>2</sub>)<sub>2</sub>}]<sub>2</sub> (2c)** in C<sub>6</sub>D<sub>6</sub>.

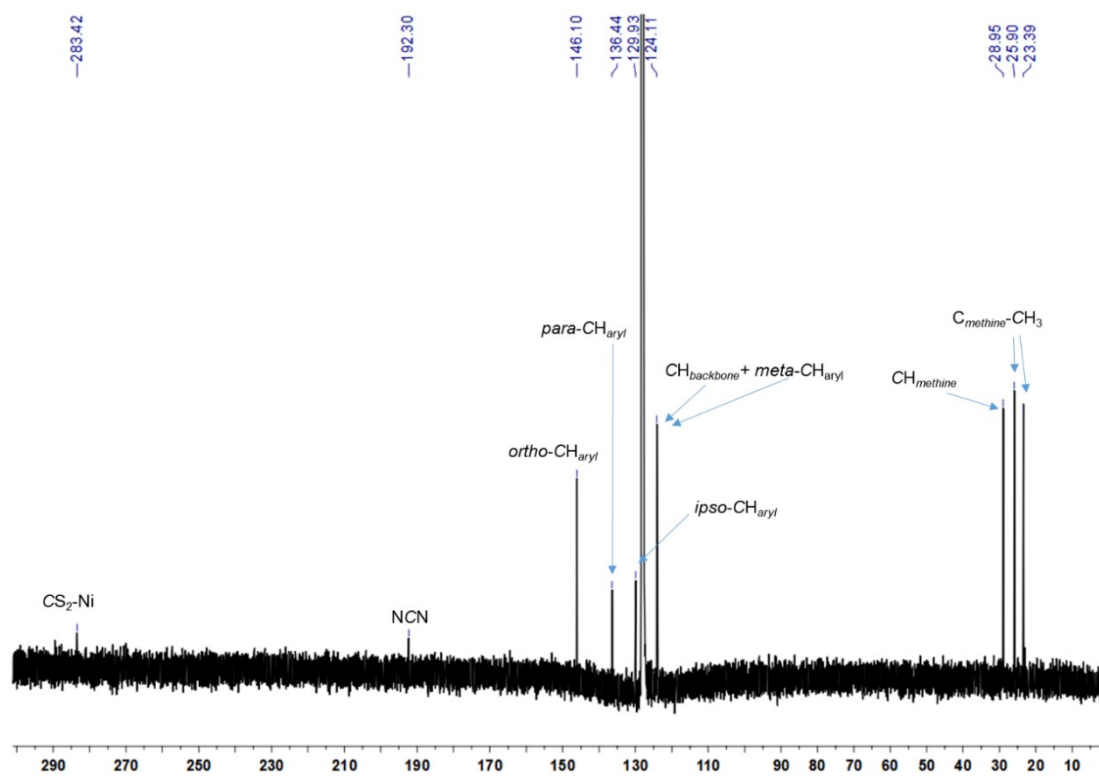

**Figure S6.** <sup>13</sup>C{<sup>1</sup>H} NMR spectrum of **[{Ni(IDipp)( $\mu^2$ -CS<sub>2</sub>)<sub>2</sub>}]<sub>2</sub> (2c)** in C<sub>6</sub>D<sub>6</sub>.

**[{Ni(IMes)( $\mu^2$ -CS<sub>2</sub>)<sub>2</sub>]<sub>2</sub> (2d)**

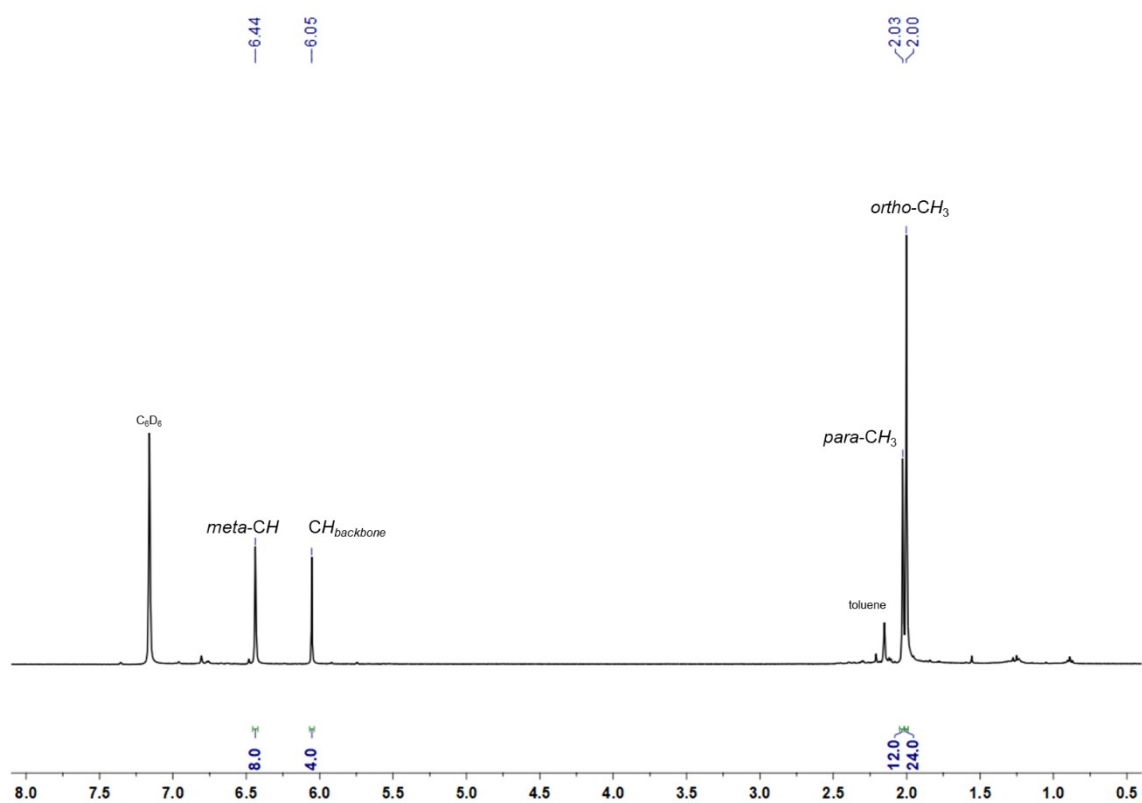

**Figure S7.** <sup>1</sup>H NMR spectrum of **[{Ni(IMes)( $\mu^2$ -CS<sub>2</sub>)<sub>2</sub>]<sub>2</sub> (2d)** in C<sub>6</sub>D<sub>6</sub>.

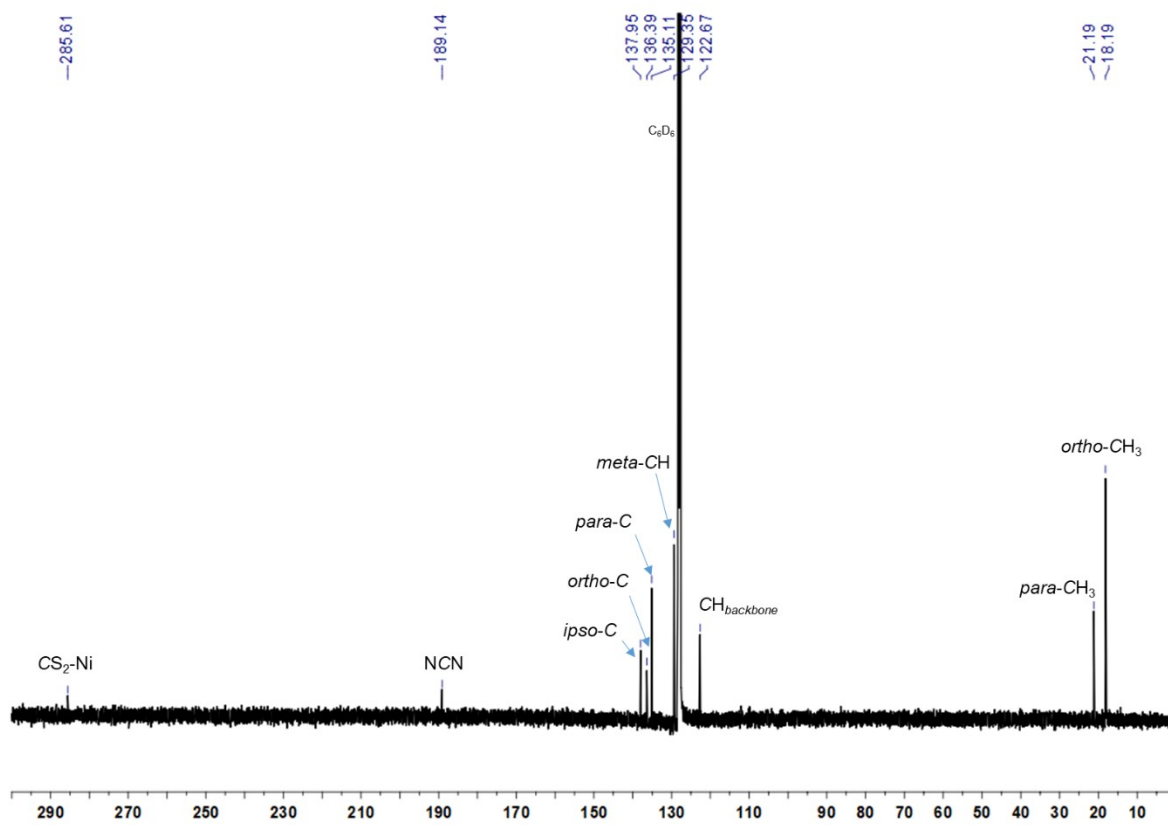

**Figure S8.** <sup>13</sup>C{<sup>1</sup>H} NMR spectrum of **[{Ni(IMes)( $\mu^2$ -CS<sub>2</sub>)<sub>2</sub>]<sub>2</sub> (2d)** in C<sub>6</sub>D<sub>6</sub>.

**[Ni(cAAC<sup>Me</sup>-CS<sub>2</sub>)<sub>2</sub>] (3e)**

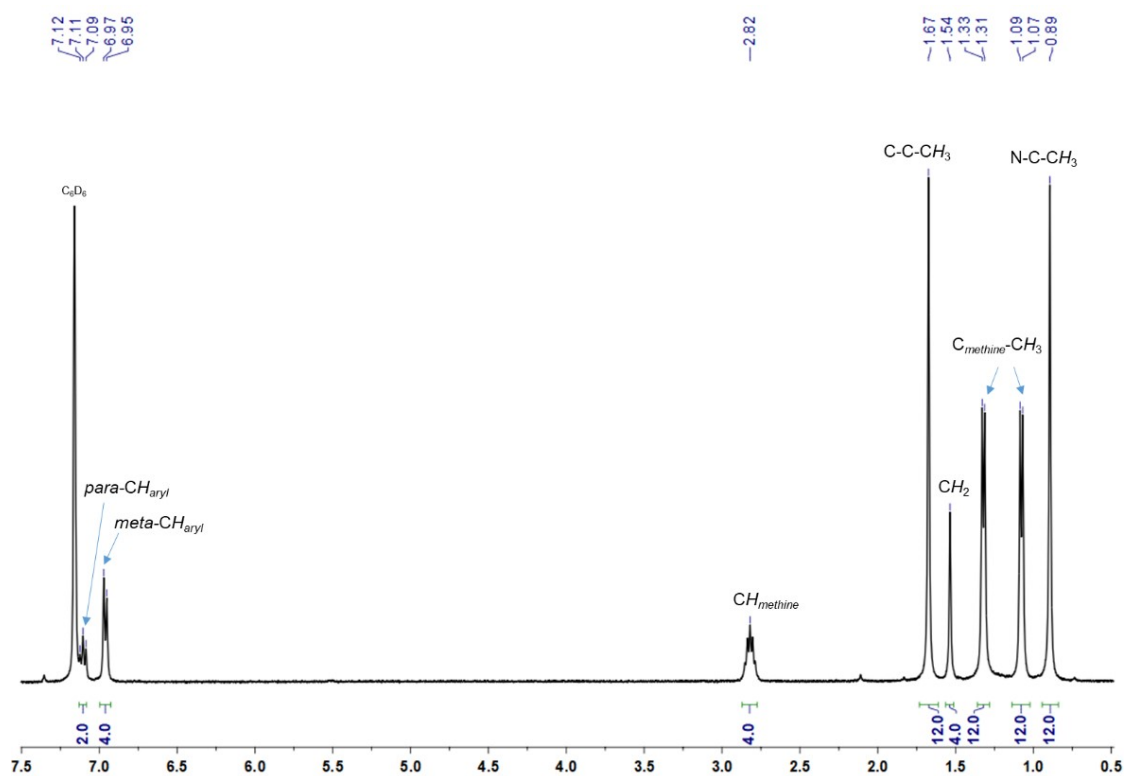

**Figure S9.** <sup>1</sup>H NMR spectrum of [Ni(cAAC<sup>Me</sup>-CS<sub>2</sub>)<sub>2</sub>] (3e) in C<sub>6</sub>D<sub>6</sub>.

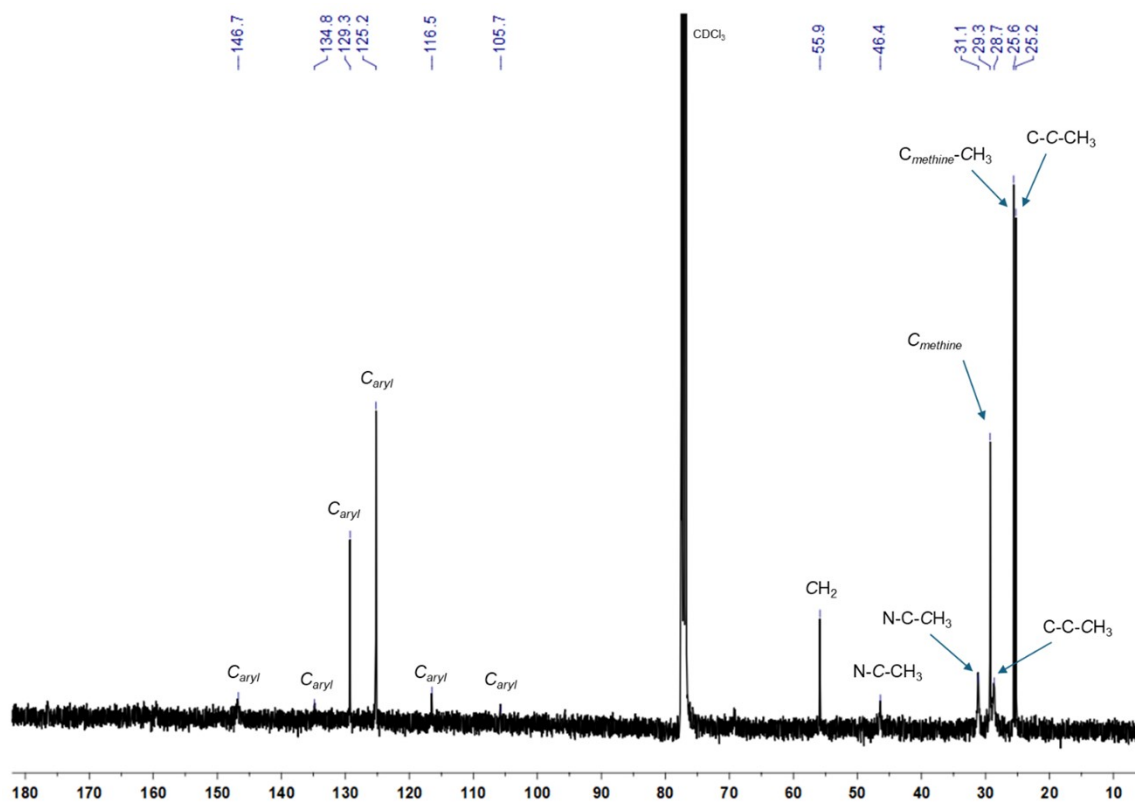

**Figure S10.** <sup>13</sup>C{<sup>1</sup>H} NMR spectrum of [Ni(cAAC<sup>Me</sup>-CS<sub>2</sub>)<sub>2</sub>] (3e) in CDCl<sub>3</sub>. Resonances of the former carbene carbon atom as well as of the CS<sub>2</sub> group were not detected.

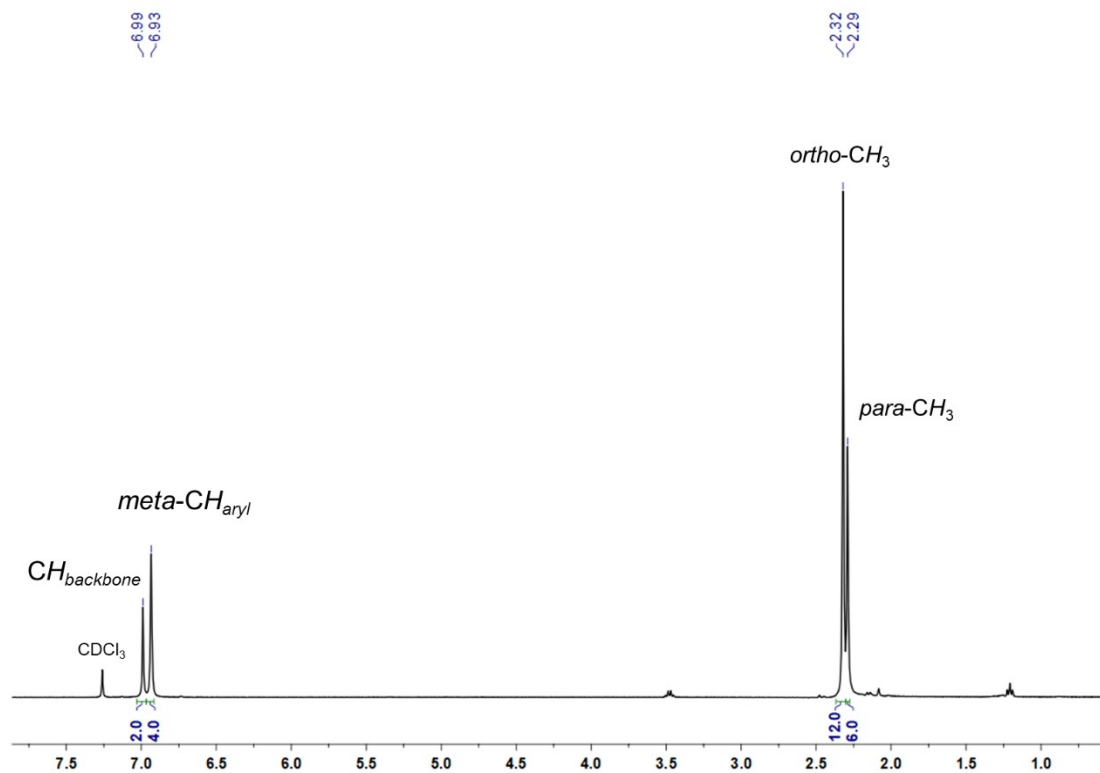

**Figure S11.**  $^1\text{H}$  NMR spectrum of the isolated side-product IMes-CS<sub>2</sub> obtained from the reaction of [Ni(IMes)<sub>2</sub>] with CS<sub>2</sub> in CDCl<sub>3</sub>.

## 2 IR Spectra

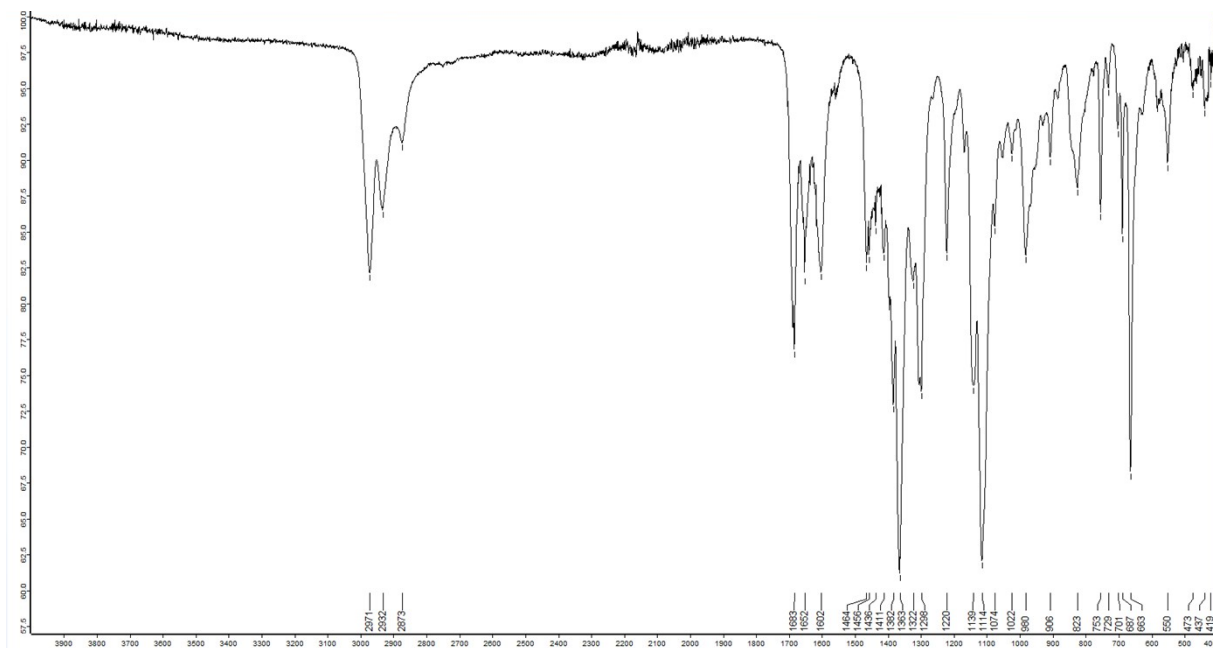

**Figure S12.** FT-IR spectrum (ATR) of  $[\text{Ni}(\text{IIPr}^{\text{Me}})_2(\eta^2\text{-CS}_2)]$  (**1a**).

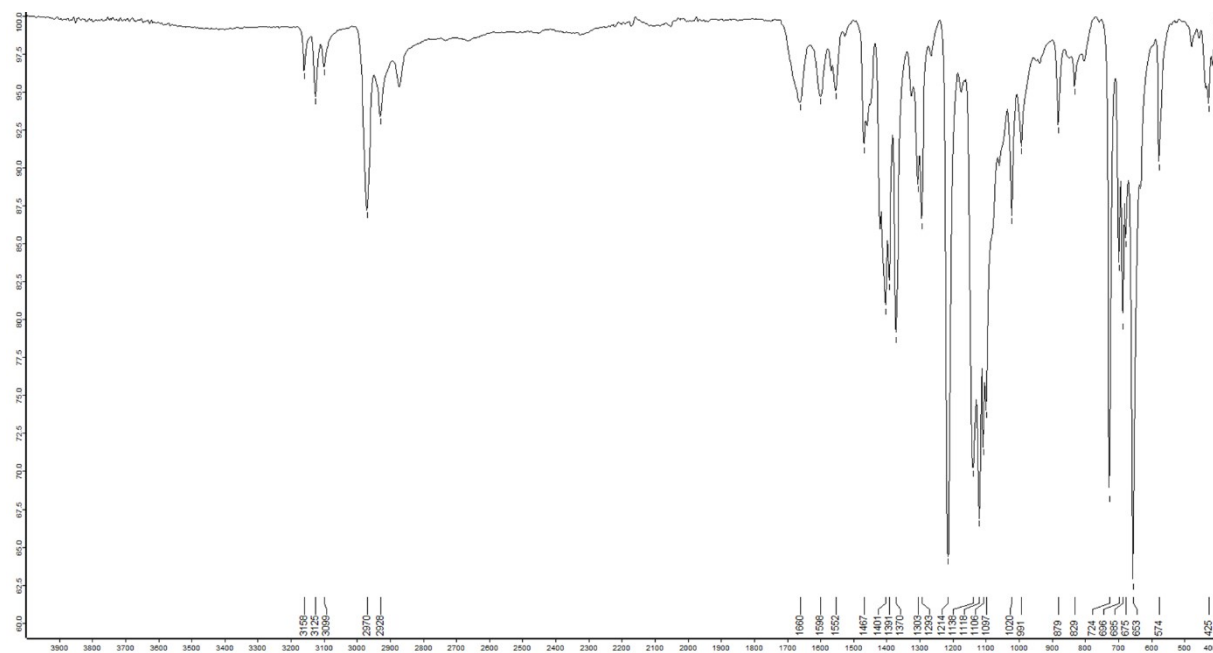

**Figure S13.** FT-IR spectrum (ATR) of  $[\text{Ni}(\text{IIPr})_2(\eta^2\text{-CS}_2)]$  (**1b**).



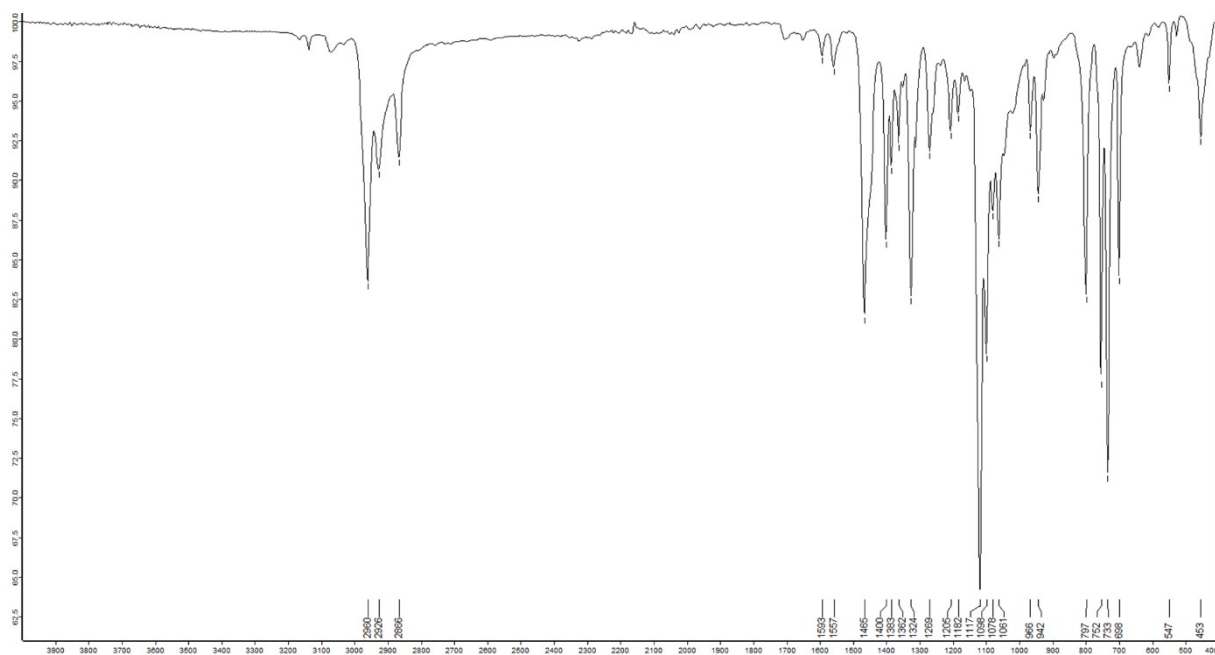

**Figure S14.** FT-IR spectrum (ATR) of  $[\{\text{Ni}(\text{IDipp})(\mu^2\text{-CS}_2)\}_2]$  (**2c**).

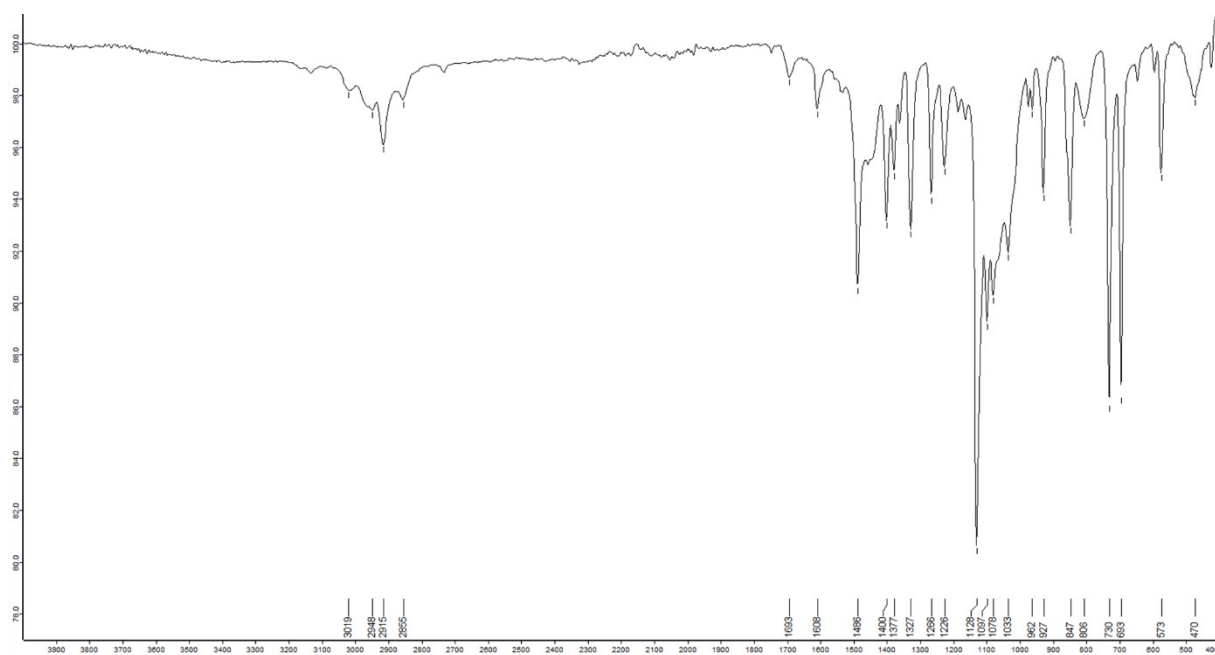

**Figure S15.** FT-IR spectrum (ATR) of  $[\{\text{Ni}(\text{IMes})(\mu^2\text{-CS}_2)\}_2]$  (**2d**).

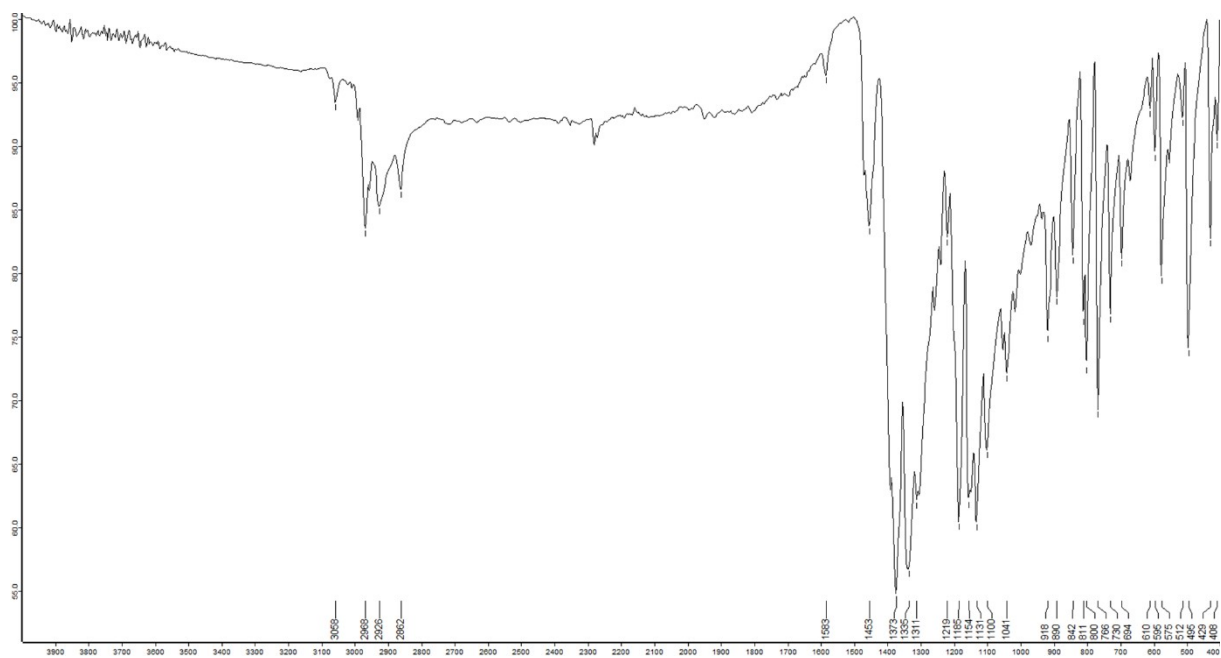

**Figure S16.** FT-IR spectrum (ATR) of [Ni(cAAC<sup>Me</sup>-CS<sub>2</sub>)<sub>2</sub>] (**3e**).

### 3 High Resolution Mass Spectrometry (HRMS) Data

#### $[\{\text{Ni}(\text{IMes})(\mu^2\text{-CS}_2)\}_2] (\mathbf{2d})$

LIFDI

RT: 0.00 - 4.46

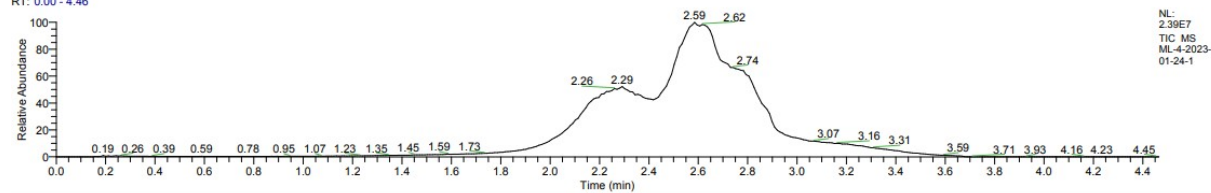

ML-4-2023-01-24-1 #180-248 RT: 1.88-2.60 AV: 69 NL: 1.04E6  
T: FTMS + p ESI Full ms2 1000.0000@hcd10.00 [250.0000-1000.0000]

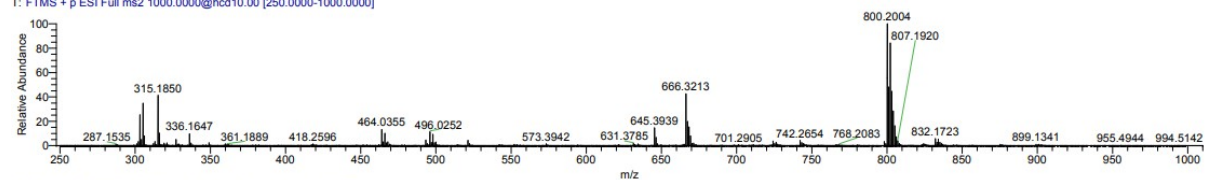

ML-4-2023-01-24-1 #180-248 RT: 1.88-2.60 AV: 69 NL: 1.04E6  
T: FTMS + p ESI Full ms2 1000.0000@hcd10.00 [250.0000-1000.0000]

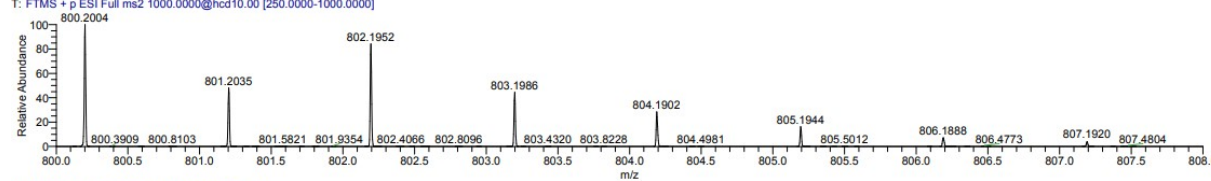

C43H48N4Ni2S2: C43 H48 N4 Ni2 S2 pa Chrg 1

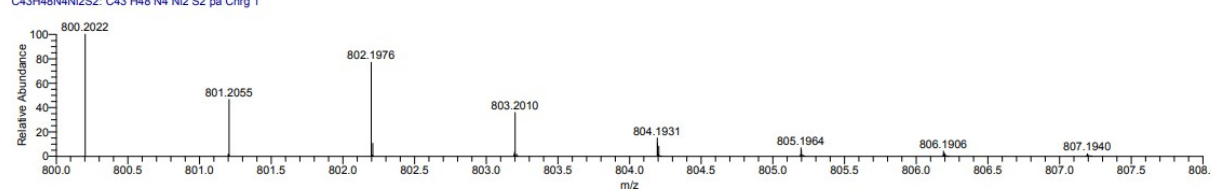

Figure S17. Results of the mass spectrometric investigations of  $[\{\text{Ni}(\text{IMes})(\mu^2\text{-CS}_2)\}_2] (\mathbf{2d})$ .

# [Ni(cAAC<sup>Me</sup>-CS<sub>2</sub>)<sub>2</sub>] (3e)

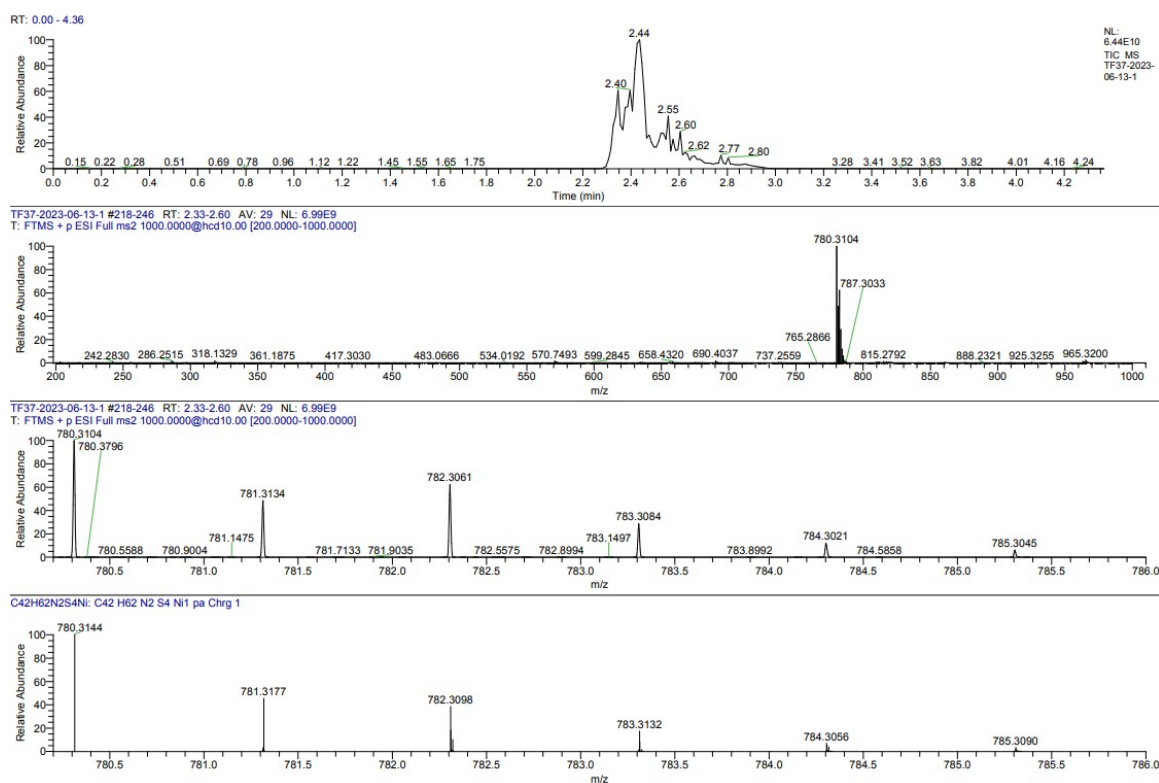

**Figure S18.** Results of the LIFDI mass spectrometric investigations of [Ni(cAAC<sup>Me</sup>-CS<sub>2</sub>)<sub>2</sub>] (**3e**) dissolved in THF.

#### 4 Cartesian Coordinates of Geometry Optimized Complexes (PBE0-D3(BJ)//def2-TZVP(Ni)/def2-SVP(C,H,N,S))

##### [Ni(IIPr<sup>Me</sup>)<sub>2</sub>(η<sup>2</sup>-CS<sub>2</sub>)] (1a)

Energy = -3421.559356860

|    |            |            |            |
|----|------------|------------|------------|
| Ni | -0.0676394 | -0.1156625 | 1.3457645  |
| C  | 1.3207145  | -0.5464111 | 0.1354872  |
| N  | 2.5573944  | 0.0019701  | 0.0353959  |
| C  | 3.3030239  | -0.6278628 | -0.9582029 |
| C  | 2.5004646  | -1.6004722 | -1.4871389 |
| N  | 1.2902829  | -1.5213630 | -0.8038557 |
| C  | 3.0154290  | 1.0088654  | 0.9986024  |
| H  | 2.1003989  | 1.2184881  | 1.5774659  |
| C  | 4.0405829  | 0.4369234  | 1.9670338  |
| H  | 3.6611774  | -0.5000256 | 2.4011672  |
| H  | 4.2109744  | 1.1523520  | 2.7851535  |
| H  | 5.0110604  | 0.2488006  | 1.4831561  |
| C  | 3.4771384  | 2.3013517  | 0.3396345  |
| H  | 4.4427317  | 2.1883933  | -0.1734819 |
| H  | 3.6069423  | 3.0741274  | 1.1113901  |
| H  | 2.7421272  | 2.6711000  | -0.3887977 |
| C  | 0.1467854  | -2.4310037 | -0.8738754 |
| H  | -0.5888055 | -1.9285896 | -0.2252679 |
| C  | 0.4736251  | -3.7715497 | -0.2324229 |
| H  | 1.2004932  | -4.3504026 | -0.8227993 |
| H  | -0.4408481 | -4.3770789 | -0.1427123 |
| H  | 0.8867654  | -3.6094029 | 0.7750693  |
| C  | -0.4546060 | -2.5258110 | -2.2672103 |
| H  | -0.6601352 | -1.5235459 | -2.6728305 |
| H  | -1.4085145 | -3.0715678 | -2.2156729 |
| H  | 0.1887001  | -3.0662595 | -2.9757379 |
| C  | -1.4395696 | 0.6589987  | 0.1668253  |
| N  | -1.3456058 | 1.6534175  | -0.7513331 |
| C  | -2.5385339 | 1.8225818  | -1.4473772 |
| C  | -3.4093156 | 0.8974171  | -0.9405266 |
| N  | -2.7116407 | 0.1981921  | 0.0383674  |
| C  | -0.0792329 | 2.3499227  | -0.9656594 |
| H  | 0.5405077  | 1.9652896  | -0.1431782 |
| C  | 0.5767538  | 1.9254862  | -2.2726025 |
| H  | 0.6913035  | 0.8323215  | -2.3038666 |
| H  | 1.5780089  | 2.3733240  | -2.3561569 |
| H  | -0.0012002 | 2.2434877  | -3.1531382 |
| C  | -0.1901795 | 3.8575378  | -0.7947028 |
| H  | -0.7023954 | 4.3463105  | -1.6353717 |
| H  | 0.8183196  | 4.2925689  | -0.7299392 |
| H  | -0.7246977 | 4.1036173  | 0.1342773  |
| C  | -3.2243557 | -0.8589624 | 0.9150983  |
| H  | -2.3220255 | -1.1979098 | 1.4479738  |
| C  | -4.1651362 | -0.3038571 | 1.9726194  |
| H  | -3.6705982 | 0.5073079  | 2.5253222  |
| H  | -4.4174460 | -1.0952960 | 2.6935033  |
| H  | -5.1055680 | 0.0775262  | 1.5460841  |
| C  | -3.7918089 | -2.0454185 | 0.1499662  |
| H  | -4.7779044 | -1.8422390 | -0.2911477 |
| H  | -3.9107300 | -2.8939458 | 0.8394377  |
| H  | -3.1097658 | -2.3573877 | -0.6546823 |
| C  | 0.6003822  | -0.9943712 | 2.8165588  |
| C  | -2.7847621 | 2.8451297  | -2.4991039 |
| H  | -2.0165690 | 2.8321382  | -3.2860078 |
| H  | -3.7501523 | 2.6539699  | -2.9849146 |
| H  | -2.8193892 | 3.8661083  | -2.0876464 |
| C  | -4.8206505 | 0.6441514  | -1.3361171 |
| H  | -4.9369045 | -0.3042968 | -1.8833877 |

|   |            |            |            |
|---|------------|------------|------------|
| H | -5.4953425 | 0.6099920  | -0.4687153 |
| H | -5.1743820 | 1.4491795  | -1.9930063 |
| C | 4.6802430  | -0.2445586 | -1.3661156 |
| H | 4.7049321  | 0.7266180  | -1.8859303 |
| H | 5.3661732  | -0.1804020 | -0.5097656 |
| H | 5.0863205  | -0.9951020 | -2.0566035 |
| C | 2.7954130  | -2.5499096 | -2.5924026 |
| H | 2.5438208  | -3.5864384 | -2.3250518 |
| H | 2.2475041  | -2.3022068 | -3.5157255 |
| H | 3.8668069  | -2.5243622 | -2.8299822 |
| S | -0.7606097 | -0.2009960 | 3.4318888  |
| S | 1.7230187  | -2.0769979 | 3.3084220  |

##### [[Ni(IMes)(μ<sup>2</sup>-CS<sub>2</sub>)]<sub>2</sub>] (2d)

Energy = -6529.247110910

|    |            |            |           |
|----|------------|------------|-----------|
| Ni | 8.0267690  | 3.8083571  | 6.3404149 |
| S  | 8.1841686  | 6.9266518  | 7.5045918 |
| S  | 6.6394931  | 5.2673016  | 5.4327349 |
| N  | 8.6060972  | 1.2365196  | 4.9096418 |
| N  | 6.6636277  | 1.2541317  | 5.8025393 |
| C  | 5.5110687  | 1.7041409  | 6.5166061 |
| C  | 7.7758376  | 2.0154274  | 5.6478515 |
| C  | 9.9166039  | 1.6402236  | 4.5078734 |
| C  | 10.0489560 | 2.5716793  | 3.4710099 |
| C  | 11.0248800 | 1.1098721  | 5.1861809 |
| C  | 4.4523445  | 2.2641231  | 5.7921680 |
| C  | 5.4981129  | 1.6095467  | 7.9148673 |
| C  | 8.0225609  | 0.0187455  | 4.6026484 |
| H  | 8.5329507  | -0.7327990 | 4.0073476 |
| C  | 12.2916503 | 1.5397493  | 4.7941004 |
| H  | 13.1651217 | 1.1471141  | 5.3224203 |
| C  | 3.3474628  | 2.7282282  | 6.5081065 |
| H  | 2.5143604  | 3.1757587  | 5.9590047 |
| C  | 11.3413501 | 2.9713979  | 3.1194361 |
| H  | 11.4630010 | 3.7034793  | 2.3161225 |
| C  | 12.4713583 | 2.4703527  | 3.7660676 |
| C  | 6.7903616  | 0.0288631  | 5.1721479 |
| H  | 5.9992973  | -0.7152649 | 5.1884475 |
| C  | 4.5317805  | 2.3968170  | 4.3012819 |
| H  | 5.4197770  | 2.9832353  | 4.0161885 |
| H  | 3.6427908  | 2.9037600  | 3.9036626 |
| H  | 4.6185751  | 1.4175737  | 3.8046076 |
| C  | 3.2882707  | 2.6500061  | 7.9010917 |
| C  | 4.3704101  | 2.0876164  | 8.5838474 |
| H  | 4.3422707  | 2.0233864  | 9.6754907 |
| C  | 7.7610038  | 5.5821565  | 6.6253698 |
| C  | 10.8513895 | 0.1572094  | 6.3312174 |
| H  | 10.3193438 | 0.6533680  | 7.1591572 |
| H  | 11.8264222 | -0.1761239 | 6.7103528 |
| H  | 10.2700808 | -0.7340920 | 6.0504248 |
| C  | 8.8501727  | 3.1500983  | 2.7815802 |
| H  | 9.1352239  | 3.6208004  | 1.8309921 |
| H  | 8.3707513  | 3.9158911  | 3.4147575 |
| H  | 8.0876719  | 2.3835747  | 2.5768668 |
| C  | 6.6705096  | 1.0526851  | 8.6637675 |
| H  | 7.5076276  | 1.7716996  | 8.6614592 |
| H  | 7.0457690  | 0.1251058  | 8.2056817 |
| H  | 6.4053373  | 0.8421275  | 9.7084987 |
| C  | 2.1057312  | 3.1827907  | 8.6566413 |
| H  | 2.3598674  | 4.1289253  | 9.1614112 |

|    |            |            |            |   |            |            |            |
|----|------------|------------|------------|---|------------|------------|------------|
| H  | 1.7757739  | 2.4788125  | 9.4356574  | H | 11.9055611 | 7.1172664  | 11.7966434 |
| H  | 1.2543605  | 3.3795103  | 7.9901676  | H | 13.6306665 | 7.2953530  | 12.2082250 |
| C  | 13.8511517 | 2.9066704  | 3.3674634  | H | 12.5335841 | 8.6939699  | 12.3036148 |
| H  | 13.8218893 | 3.7871428  | 2.7105553  | C | 14.5855199 | 8.0376706  | 8.3735957  |
| H  | 14.3800662 | 2.1038807  | 2.8277486  | C | 13.5772405 | 8.5941714  | 7.5815529  |
| H  | 14.4588619 | 3.1586290  | 4.2498033  | H | 13.7687491 | 8.7804116  | 6.5208368  |
| Ni | 9.7012984  | 6.3970011  | 8.9880891  | C | 10.0392581 | 4.6480066  | 8.6353415  |
| S  | 9.6518141  | 3.3155041  | 7.7194373  | C | 6.7283279  | 9.9333735  | 8.9054910  |
| S  | 11.1071651 | 4.9469318  | 9.8803182  | H | 7.4914635  | 9.6305940  | 8.1708105  |
| N  | 8.7547551  | 8.7495386  | 10.5473599 | H | 5.8289864  | 10.2316540 | 8.3508516  |
| N  | 10.8162270 | 8.9499675  | 10.0161863 | H | 7.1112720  | 10.8177964 | 9.4371768  |
| C  | 12.1005532 | 8.6632809  | 9.4617792  | C | 8.2731030  | 6.5207705  | 12.3022743 |
| C  | 9.7532461  | 8.1202596  | 9.8756315  | H | 7.8508532  | 5.9091322  | 13.1111285 |
| C  | 7.4272019  | 8.2276372  | 10.6362873 | H | 8.9171987  | 5.8734966  | 11.6830219 |
| C  | 7.1843421  | 7.1312664  | 11.4723219 | H | 8.9258694  | 7.2865018  | 12.7470285 |
| C  | 6.4255454  | 8.7956979  | 9.8340797  | C | 11.2317198 | 9.4564179  | 7.2271664  |
| C  | 13.0778738 | 8.1004916  | 10.2906656 | H | 10.4767818 | 8.6784822  | 7.0212827  |
| C  | 12.3213441 | 8.9117425  | 8.1005678  | H | 10.7033300 | 10.2945445 | 7.7061500  |
| C  | 9.1869917  | 9.9423764  | 11.1006467 | H | 11.6344204 | 9.8025093  | 6.2658699  |
| H  | 8.5306248  | 10.5807511 | 11.6849151 | C | 15.9114670 | 7.6724240  | 7.7722463  |
| C  | 5.1545882  | 8.2262261  | 9.8822984  | H | 15.8239449 | 6.7577721  | 7.1630157  |
| H  | 4.3689049  | 8.6428480  | 9.2458148  | H | 16.2862278 | 8.4679267  | 7.1106033  |
| C  | 14.3174820 | 7.8001432  | 9.7234208  | H | 16.6689530 | 7.4843218  | 8.5459409  |
| H  | 15.0905361 | 7.3524379  | 10.3541543 | C | 3.4927631  | 6.5269841  | 10.7090623 |
| C  | 5.8936523  | 6.5951450  | 11.4792135 | H | 3.4929227  | 5.5247893  | 11.1604930 |
| H  | 5.6896681  | 5.7295428  | 12.1157746 | H | 2.7955155  | 7.1541836  | 11.2889378 |
| C  | 4.8705613  | 7.1217469  | 10.6908736 | H | 3.0850235  | 6.4444948  | 9.6902176  |
| C  | 10.4951404 | 10.0714292 | 10.7609194 |   |            |            |            |
| H  | 11.2204847 | 10.8507621 | 10.9760936 |   |            |            |            |
| C  | 12.7765661 | 7.7883989  | 11.7257028 |   |            |            |            |
